# Supplementary material
Source: PubMed Central journal article supplement (PMC5033915)
Supplement: jciinsight-1-86336-s001.pdf [file jciinsight-1-86336-s001.pdf]

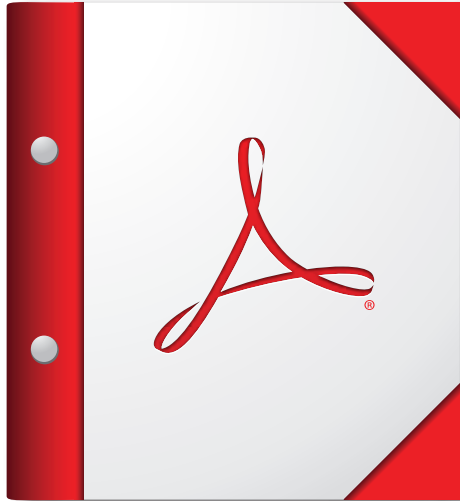

**For the best experience, open this PDF portfolio in  
Acrobat X or Adobe Reader X, or later.**

[Get Adobe Reader Now!](#)
